# Supplementary material for: Image-Guided Enhanced PDT/PTT Combination Therapy Using Brominated Hemicyanine-Loaded Folate Receptor-Targeting Ag2S Quantum Dots
Source: PubMed Central journal article supplement (PMC10197082; doi:10.1021/acs.bioconjchem.3c00096), 2023-04-20
Supplement: bc3c00096_si_001.pdf [file bc3c00096_si_001.pdf]

# Image-Guided Enhanced PDT/PTT Combination Therapy Using Brominated Hemicyanine Loaded Folate Receptor Targeting Ag<sub>2</sub>S Quantum Dots

*Eda Celikbas<sup>1</sup>, Ayca Saymaz<sup>1</sup>, Hande Gunduz<sup>1,2</sup>, Irem Koc<sup>3</sup>, Ece Cakir<sup>3</sup>, Alphan Sennaroglu<sup>4,5</sup>, Safacan Kolemen<sup>1,4\*</sup>, Havva Yagci Acar<sup>1,4\*</sup> and Kubra Onbasli<sup>6\*</sup>*

<sup>1</sup>Department of Chemistry, Koç University, Rumelifeneri Yolu, Sariyer, Istanbul 34450, Türkiye

<sup>2</sup>Nanofabrication and Nanocharacterization Centre for Scientific and Technological Advanced Research, Koç University, Istanbul, Türkiye

<sup>3</sup>Graduate School of Materials Science and Engineering, Koç University, Rumelifeneri Yolu, Istanbul 34450, Türkiye

<sup>4</sup>KUYTAM, Koç University Surface Science and Technology Center, Koc University, Rumelifeneri Yolu, Istanbul 34450, Türkiye

<sup>5</sup>Departments of Physics and Electrical-Electronic Engineering, Koç University, Rumelifeneri Yolu, 34450 Istanbul, Türkiye

<sup>6</sup>Department of Metallurgical and Materials Engineering, 34469 Istanbul Technical University, Istanbul, Türkiye

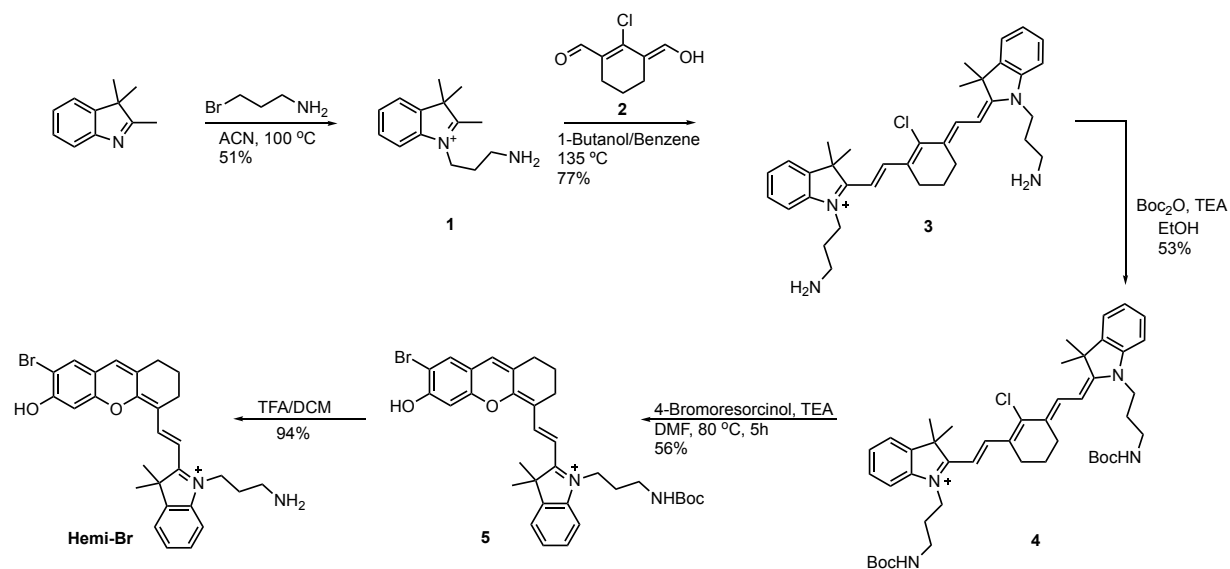

**Scheme S 1** Synthetic pathway of Hemi-Br.

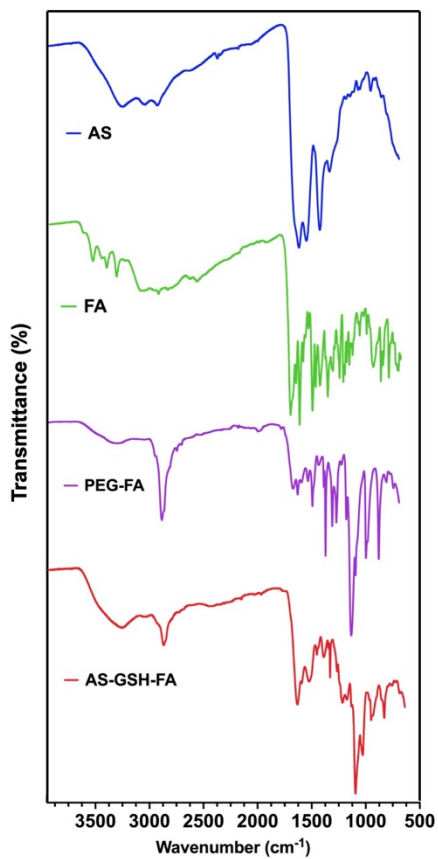

**Figure S 1** FTIR spectrum of AS-GSH QDs, FA, PEG-FA and AS-GSH-FA QDs.

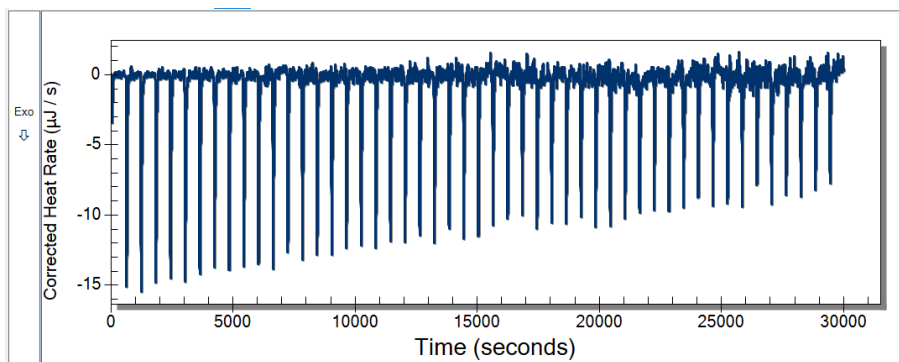

**Figure S 2.** ITC exotherm profile of the titration of AS-GSH-FA with Hemi-Br.

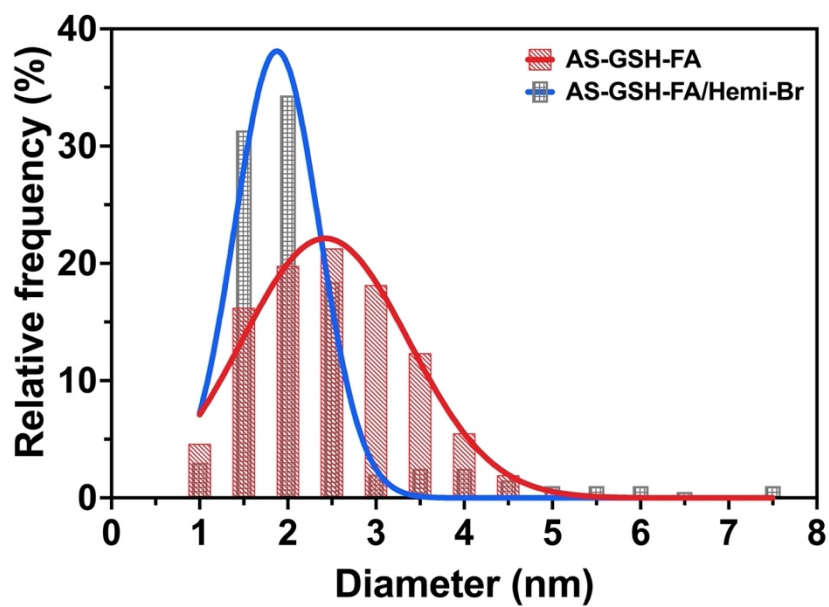

**Figure S 3** TEM histograms of the QDs corresponding to Figure 2c-d.

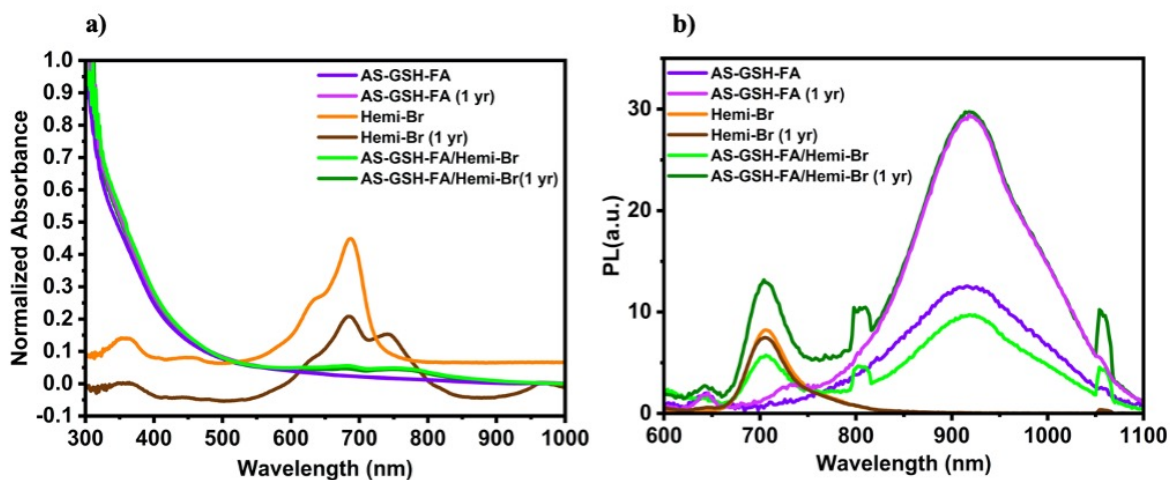

**Figure S 4** Absorbance (a) and photoluminescence (b) spectra of the QD conjugates on day one and year one of the synthesis.

**Table S 1** Hydrodynamic size and zeta potential of prepared QDs on day one and year one of the synthesis.

| Sample Name                | PDI  | Size by number (nm) | Size by intensity (nm) | Zeta Potential (mV) |
|----------------------------|------|---------------------|------------------------|---------------------|
| AS-GSH                     | 0.17 | 2.94                | 7.21                   | -42.20              |
| AS-GSH-FA                  | 0.60 | 5.22                | 7.75                   | -34.70              |
| AS-GSH-FA/Hemi-Br          | 0.47 | 75.50               | 112.20                 | -21.60              |
| AS-GSH-FA (1 year)         | 0.16 | 5.07                | 7.61                   | -14.90              |
| AS-GSH-FA/Hemi-Br (1 year) | 0.55 | 87.34               | 107.4                  | -16.70              |

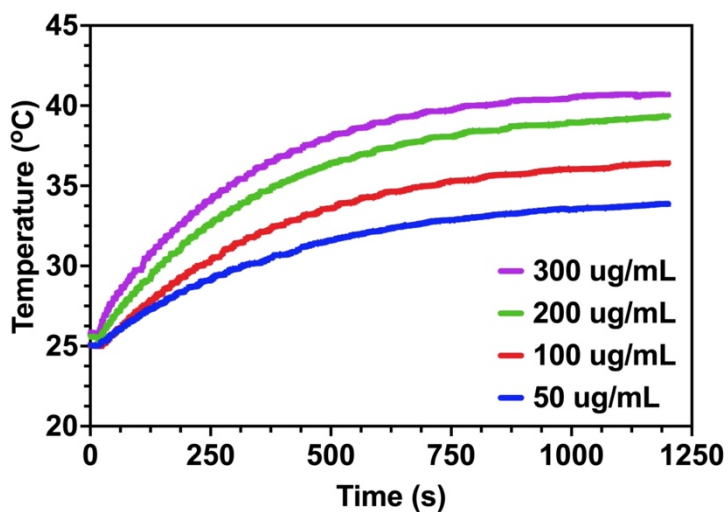

**Figure S 5.** Time and [Ag] concentration-dependent change in the temperature of AS-GSH-FA/Hemi-Br solutions irradiated at 640 nm, 215 mW.

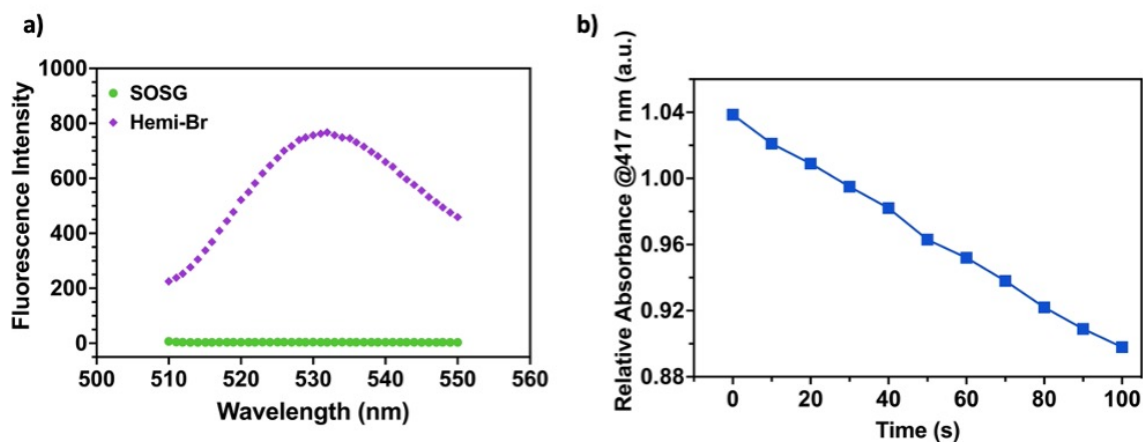

**Figure S 6.** (a) Fluorescence signal of SOSG at 525 nm upon irradiation at 640 nm (215 mW) of free Hemi-Br in 10% MeOH/PBS buffer (pH 7.4) at 7.5  $\mu$ g Hemi-Br/mL as a spectrum. (b) Decrease in the absorption signal of DPBF with respect to time upon irradiation of Hemi-Br with a 640 nm light in DMSO:PBS (99:1, pH 7.4).

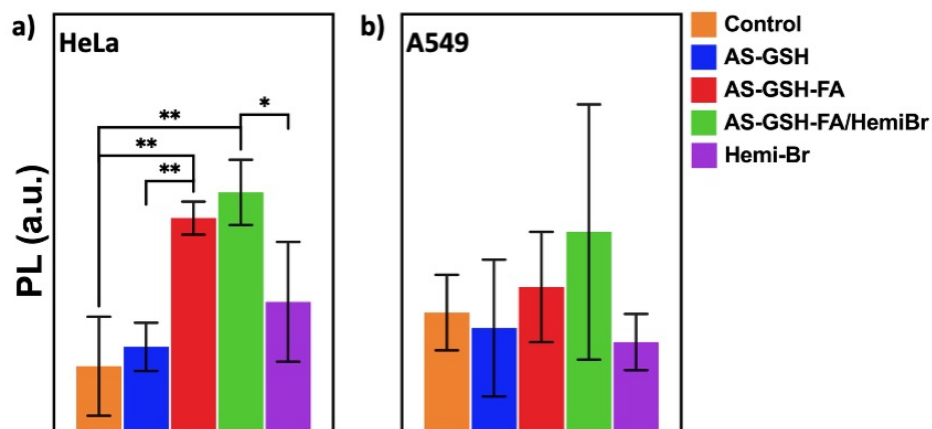

**Figure S 7.** Quantified intracellular NIR fluorescence signal measurement from (a) HeLa and (b) A549 cells treated with AS-GSH, AS-GSH-FA, AS-GSH-FA/Hemi-Br and free Hemi-Br for 6 h at 57  $\mu\text{g}$  Ag/mL and 10  $\mu\text{g}$  Hemi-Br/mL dose. The data are expressed as mean  $\pm$  S.D. (n=3). (0.0332 (\*), 0.0021 (\*\*), 0.002 (\*\*\*), < 0001 (\*\*\*\*))

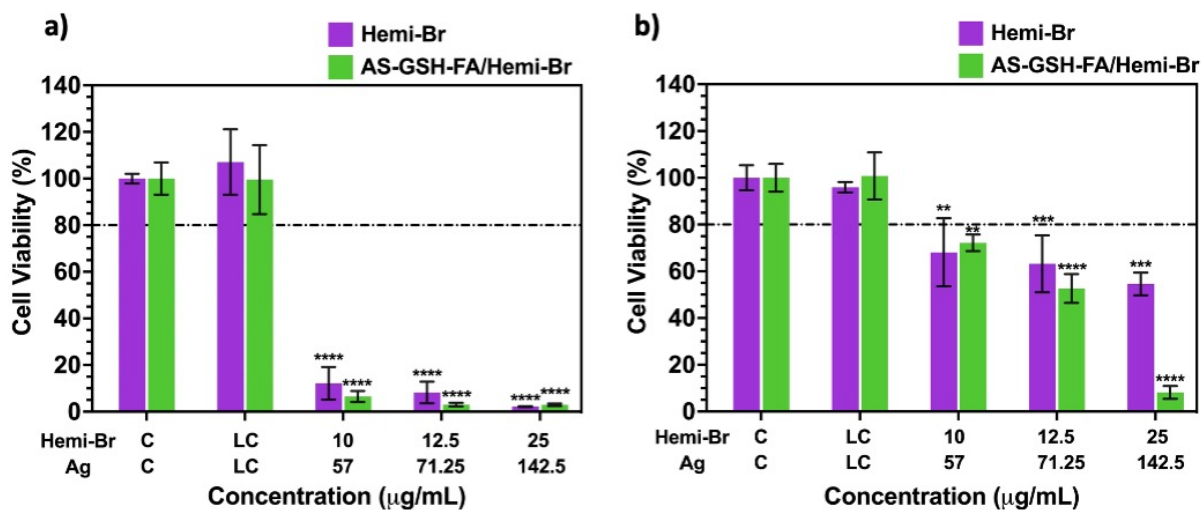

**Figure S 8.** Dose-dependent viability of (a) HeLa and (b) A549 cells treated with free Hemi-Br and QD-conjugates for 6 h and irradiated at 640 nm for 5 min at high doses. The data are expressed as mean  $\pm$  S.D. (n=3). (0.0332 (\*), 0.0021 (\*\*), 0.002 (\*\*\*), < 0001 (\*\*\*\*))

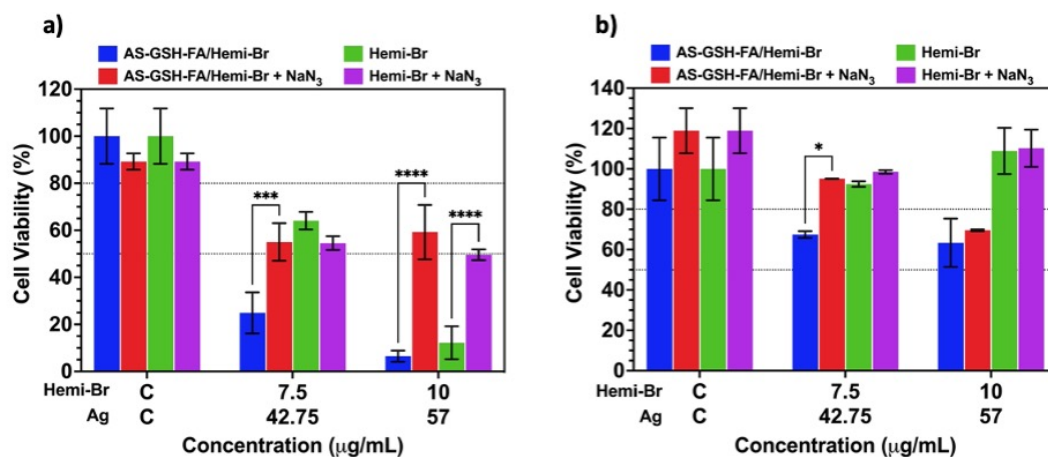

**Figure S 9.** Cell viabilities of (a) HeLa and (b) A549 cells treated with Hemi-Br and AS-GSH-FA/Hemi-Br upon laser irradiation (640 nm, 300 mW) for 5 min in the absence or presence of NaN<sub>3</sub> (5 mM). (0.0332 (\*), 0.0021 (\*\*), 0.002 (\*\*\*), < 0001 (\*\*\*\*))

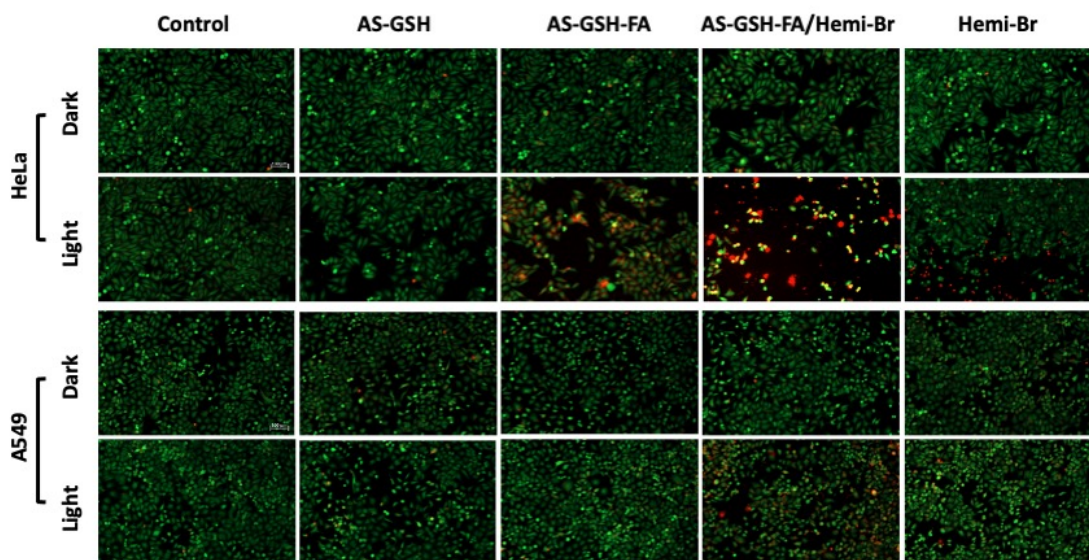

**Figure S 10.** Fluorescence microscopy images of HeLa and A549 cells treated with QDs at 42.75 µg Ag/mL and 7.5 µg Hemi-Br/mL concentrations for 6 h (Dark) followed by laser irradiation (640 nm, 300 mW, 5 min) (Light) after live/dead staining. “Control” indicates untreated cells.

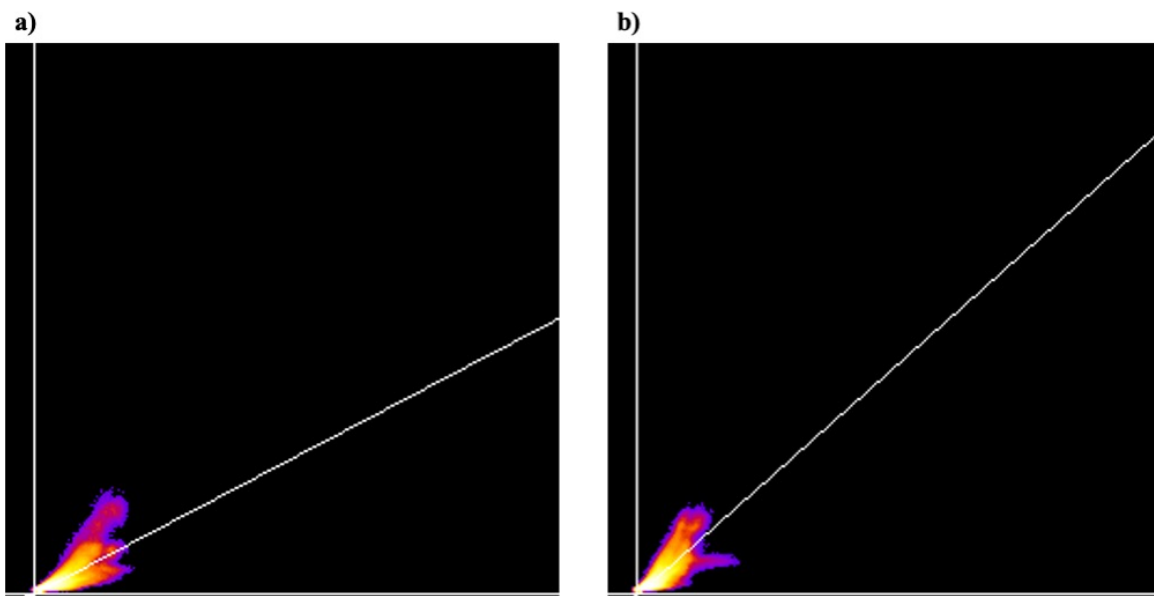

**Figure S 11.** Pearson correlation plots of MTG and (a) free Hemi-Br and (b) AS-GSH-FA/Hemi-Br. Images were processed and analyzed with ImageJ software.

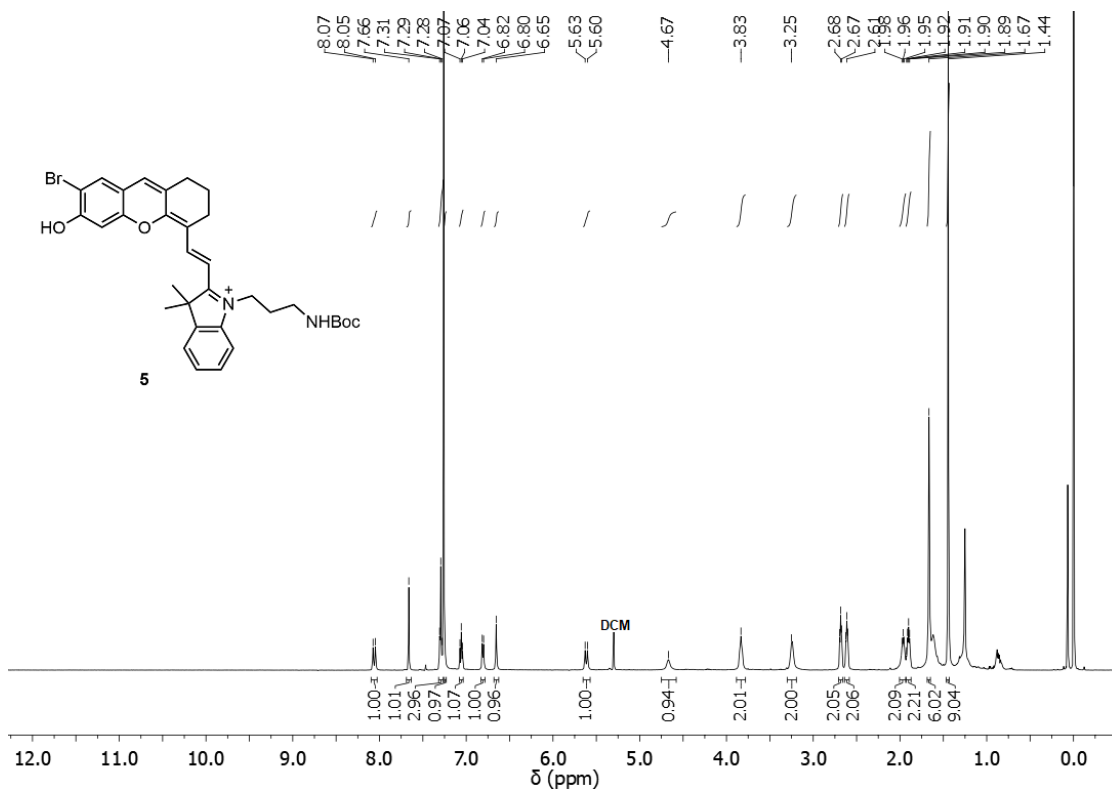

**Figure S 9.**  $^1\text{H}$  NMR spectrum of compound 5 in  $\text{CDCl}_3$ .



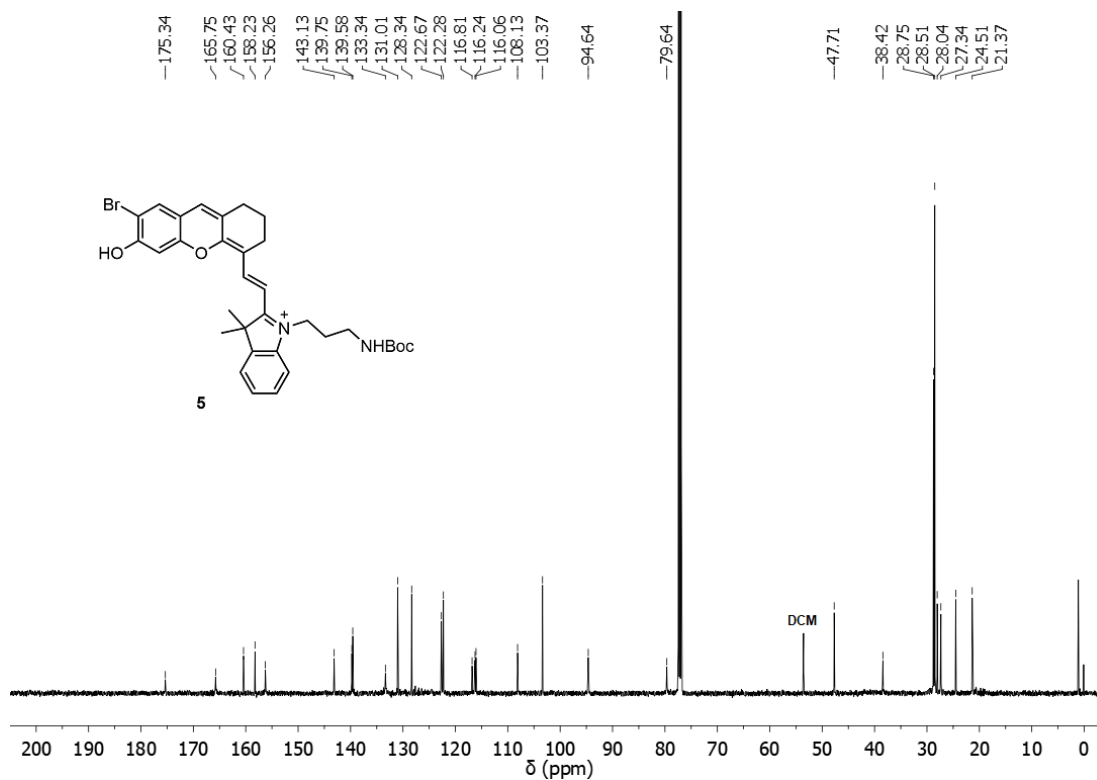

Figure S 10. <sup>13</sup>C NMR spectrum of compound **5** in CDCl<sub>3</sub>.

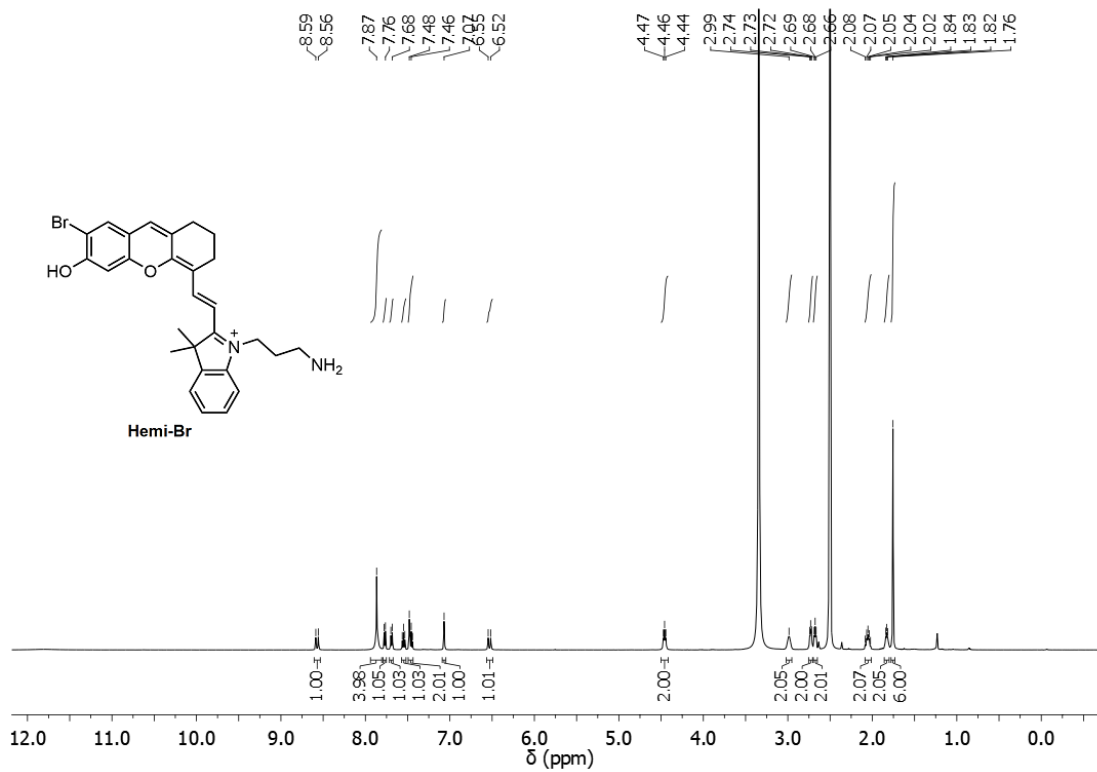

Figure S 11. <sup>1</sup>H NMR spectrum of compound **Hemi-Br** in DMSO-*d*<sub>6</sub>.

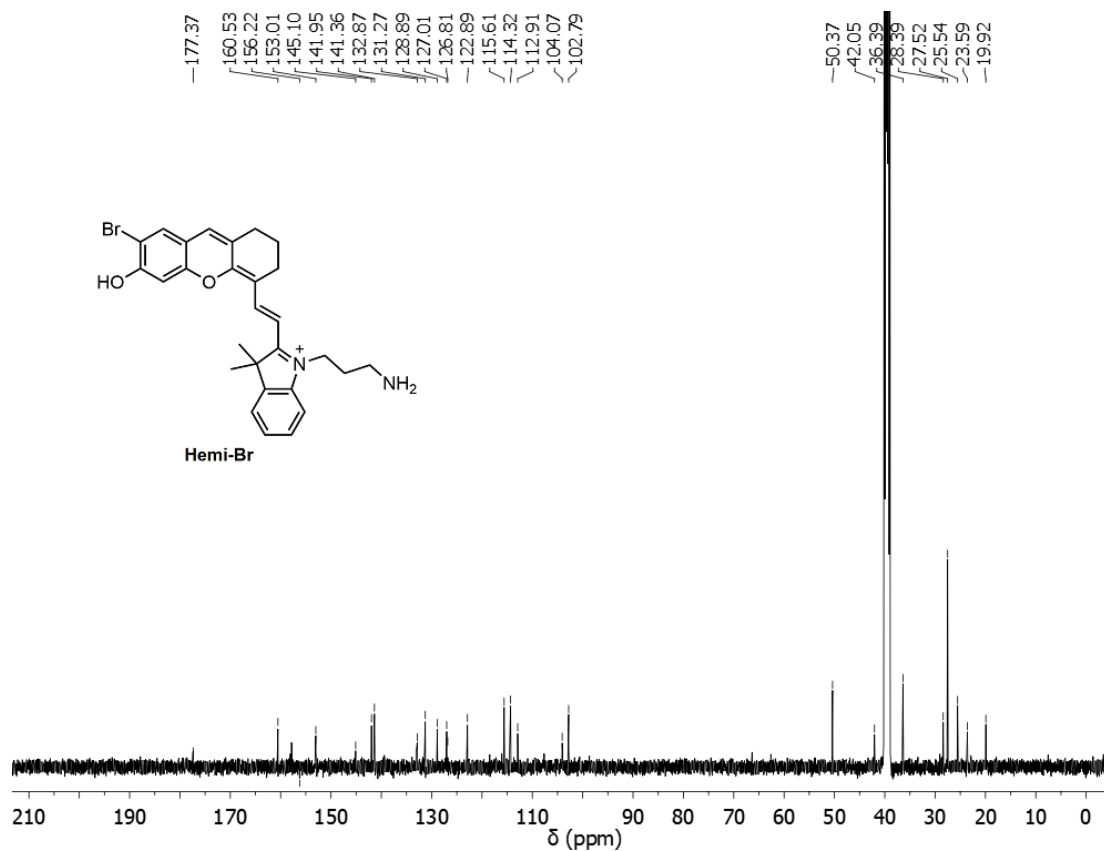

**Figure S 12.** <sup>13</sup>C NMR spectrum of compound **Hemi-Br** in DMSO-*d*<sub>6</sub>

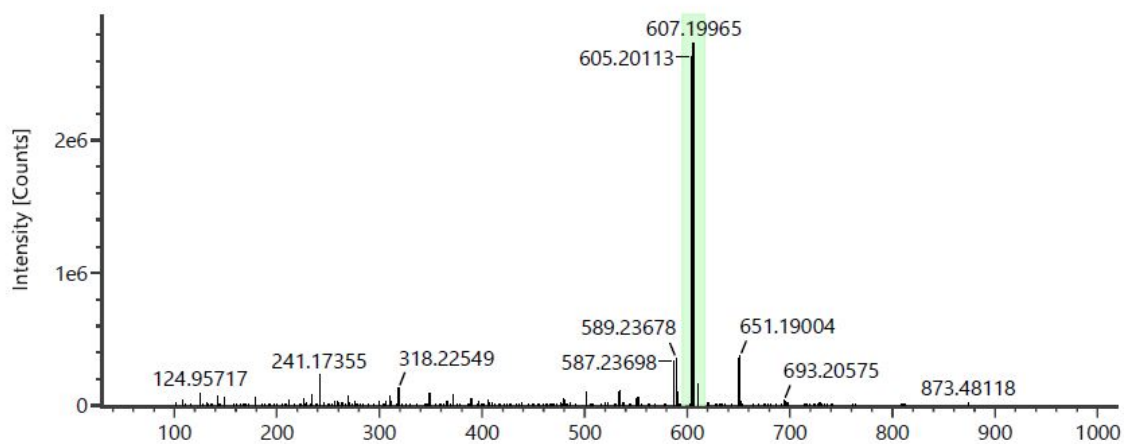

**Figure S 13.** HRMS spectrum of compound **5**.

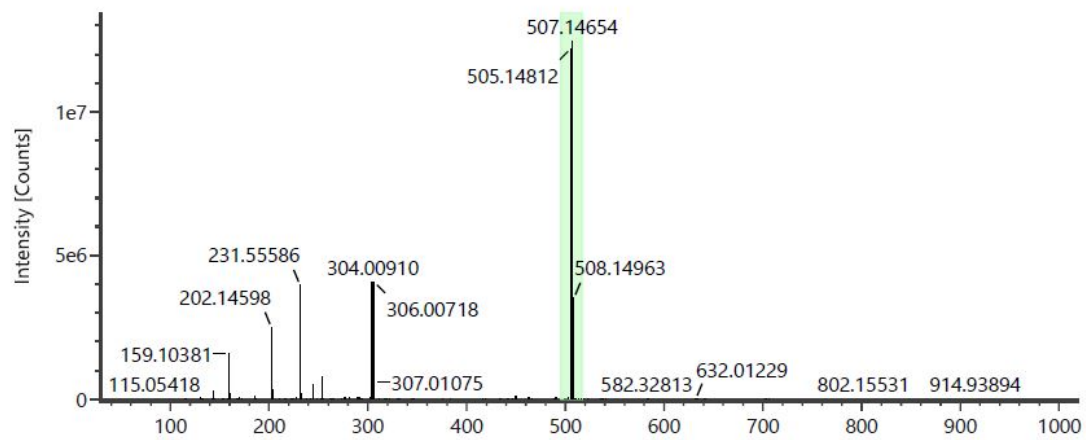

**Figure S 14.** HRMS spectrum of compound **Hemi-Br**.
